# Supplementary material for: Reproducible generation of human liver organoids (HLOs) on a pillar plate platform via microarray 3D bioprinting
Source: Royal Society of Chemistry journal article supplement (doi:10.1039/d4lc00149d), 2024-01-01
Supplement: d4lc00149d1.pdf [file d4lc00149d1.pdf]

## Supplementary Information

**Supplementary Table 1.** List of primers

| Genes                |   | Primer Sequence (5' - 3')      |
|----------------------|---|--------------------------------|
| <i>GAPDH</i>         | F | GAA GGT GAA GGT CGG AGT C      |
|                      | R | GAA GAT GGT GAT GGG ATT TC     |
| <i>OCT4 (POU5F1)</i> | F | CCT GAA GCA GAA GAG GAT CAC C  |
|                      | R | TCT TGA AGC TAA GCT GCA GA     |
| <i>SOX2</i>          | F | GCT ACA GCA TGA TGC AGG ACC A  |
|                      | R | TCT GCG AGC TGG TCA TGG AGT T  |
| <i>CXCR4</i>         | F | CTC CTC TTT GTC ATC ACG CTT CC |
|                      | R | GGA TGA GGA CAC TGC TGT AGA G  |
| <i>FOXA2</i>         | F | GGA ACA CCA CTA CGC CTT CAA C  |
|                      | R | GGA TGA GGA CAC TGC TGT AGA G  |
| <i>HNF4A</i>         | F | GGT GTC CAT ACG CAT CCT TGA C  |
|                      | R | AGC CGC TTG ATC TTC CCT GGA T  |
| <i>AFP</i>           | F | GCA GAG GAG ATG TGC TGG ATT G  |
|                      | R | ACG TTC CAG CGT GGT CAG TT     |
| <i>ALB</i>           | F | GAT GAG ATG CCT GCT GAC TTG C  |
|                      | R | CAC GAC AGA GTA ATC AGG ATG C  |
| <i>ASGR1</i>         | F | GAG AGA GAC GTT CAG CAA CTT C  |
|                      | R | GGG ACT CTA GCG ACT TCA TCT T  |
| <i>SOX9</i>          | F | AGC GAA CGC ACA TCA AGA C      |
|                      | R | CTG TAG GCG ATC TGT TGG GG     |
| <i>VM</i>            | F | CAG GCA AAG CAG GAG TCC AC     |
|                      | R | AGT GTC TTG GTA GTT AGC AGC    |
| <i>CD68</i>          | F | GGA AAT GCC ACG GTT CAT CCA    |
|                      | R | TGG GGT TCA GTA CAG AGA TGC    |
| <i>HNF4A</i>         | F | GGT GTC CAT ACG CAT CCT TGA C  |
|                      | R | AGC CGC TTG ATC TTC CCT GGA T  |
| <i>CYP3A4</i>        | F | GGC AAG CCT GTC ACC TTG AA     |
|                      | R | CGA GGC GAC TTT CTT TCA TCC TT |
| <i>UGT1A1</i>        | F | AAC AAG GAG CTC ATG GCC TCC    |
|                      | R | CCA CAA TTC CAT GTT CTC CAG    |
| <i>SULT2A1</i>       | F | CGT GAT GAG TTC GTG ATA AGG G  |
|                      | R | GAC TTG GGG AAT AAC TGG ATG G  |
| <i>F7</i>            | F | CCT CAA GTC CAT GCC AGA ATG    |
|                      | R | CAC AGA TCA GCT GGT CAT CCT    |

**Supplementary Table 2.** List of primary antibodies

| <b>Primary antibodies</b> | <b>Host/Isotype</b>     | <b>Vendor</b>                | <b>Dilution/ working concentration</b> |
|---------------------------|-------------------------|------------------------------|----------------------------------------|
| HNF3 $\beta$ /FOXA2       | Goat/polyclonal IgG     | AF2400;<br>R&D Systems       | 5 $\mu$ g/mL                           |
| SOX2                      | Mouse/monoclonal (IgG1) | sc-365823;<br>SantaCruz      | 1:40                                   |
| HNF4a                     | Mouse/monoclonal (IgG1) | sc-374229;<br>SantaCruz      | 1:40                                   |
| ALB                       | Rabbit/polyclonal (IgG) | ab2406;<br>Abcam             | 5 $\mu$ g/mL                           |
| E-cad                     | Mouse/monoclonal (IgG1) | sc-21791;<br>SantaCruz       | 1:40                                   |
| VM                        | Rabbit/polyclonal (IgG) | SAB1305445;<br>Sigma-Aldrich | 1:40                                   |

**Supplementary Table 3.** List of secondary antibodies

| <b>Secondary antibodies</b>                                                            | <b>Host</b> | <b>Vendor</b>          | <b>Dilution</b> |
|----------------------------------------------------------------------------------------|-------------|------------------------|-----------------|
| Donkey anti-Mouse IgG (H+L) Highly Cross-Adsorbed Secondary Antibody, Alexa Fluor™ 488 | Donkey      | A-21202;<br>Invitrogen | 1:400           |
| Donkey anti-Mouse IgG (H+L) Highly Cross-Adsorbed Secondary Antibody, Alexa Fluor™ 647 | Donkey      | A-31571;<br>Invitrogen | 1:400           |
| Donkey anti-Rabbit IgG (H+L) Highly Cross-Adsorbed Secondary Antibody, Alexa Fluor 488 | Donkey      | A-21206;<br>Invitrogen | 1:400           |
| Donkey anti-Rabbit IgG (H+L) Highly Cross-Adsorbed Secondary Antibody, Alexa Fluor 647 | Donkey      | A-31573;<br>Invitrogen | 1:400           |
| Donkey anti-Goat IgG (H+L) Highly Cross-Adsorbed Secondary Antibody, Alexa Fluor 647   | Donkey      | A-21447;<br>Invitrogen | 1:400           |

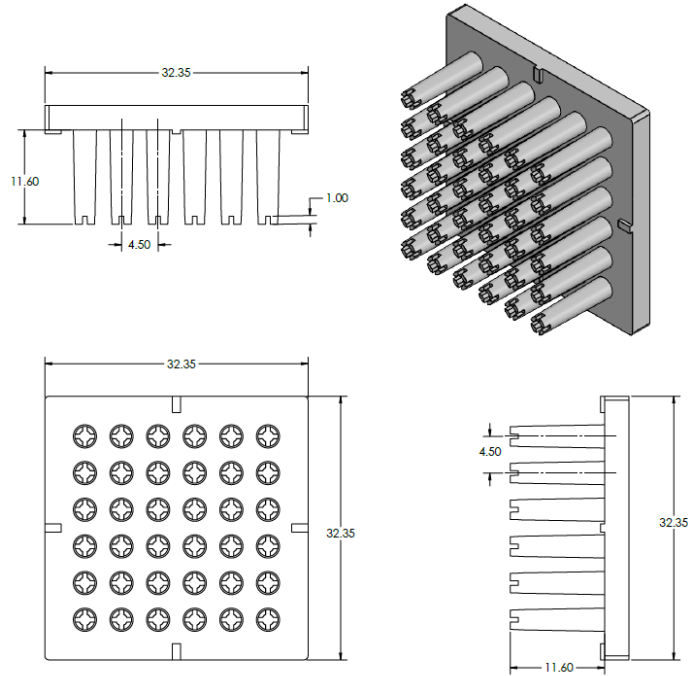

**Supplementary Figure 1.** SolidWorks design of the 36PillarPlate with a 6 x 6 array of pillars. The unit of the dimension is millimeter (mm).

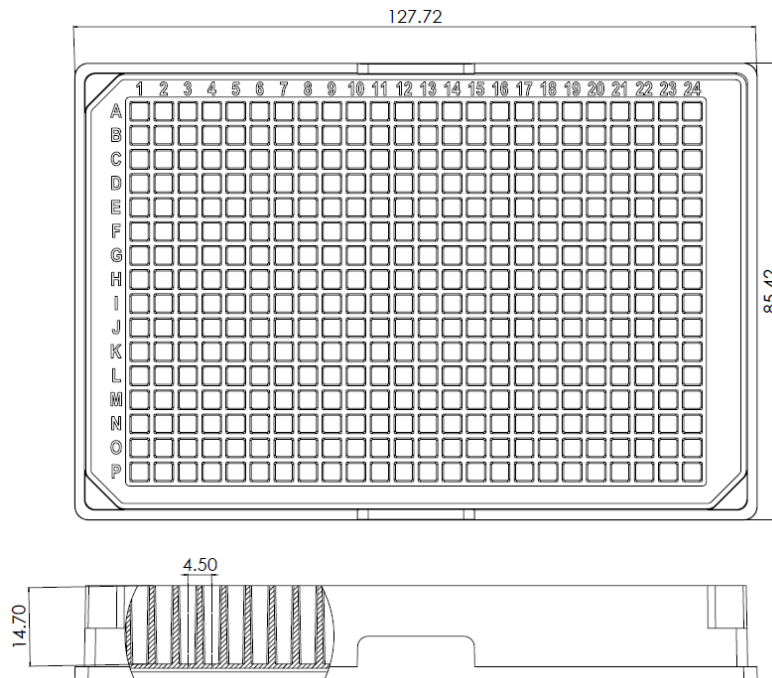

**Supplementary Figure 2.** SolidWorks design of the 384DeepWellPlate with a 16 x 24 array of deep wells. The unit of the dimension is millimeter (mm).

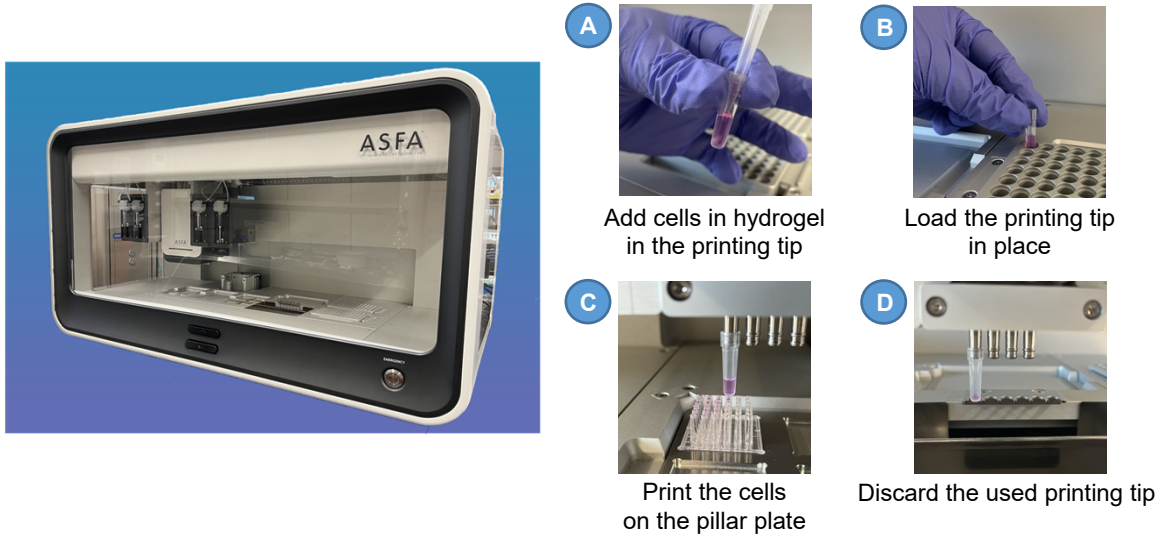

**Supplementary Figure 3. The 3D bioprinter used for cell printing on the pillar plate.** The 3D bioprinter is operated by microsolenoid valves and pneumatic pressure for sample printing. The pictures A – D illustrate crucial steps necessary for printing cells in hydrogel on the pillar plate.

**(A) Dispensing condition**

| V(nl) | O.T.( $\mu$ s) | P(kPa) | Vel   | I.T.(ms) | Ps |
|-------|----------------|--------|-------|----------|----|
| 5000  | 13800          | 6      | 40000 | 10       | 0  |

  

**(B) Plate position**

| Name            | Type | X( $\mu$ m) | Y( $\mu$ m) | Z( $\mu$ m) | W2W( $\mu$ m) |
|-----------------|------|-------------|-------------|-------------|---------------|
| Target_plate_38 | 384  | 8030        | 78600       | 38000       | 4500          |
| Source_96       | 96   | 334300      | 15900       | 49000       | 9000          |
| Target_well_384 | 384  | 7950        | 78500       | 40000       | 4500          |
| Target_plate_36 | 384  | 8030        | 78600       | 38000       | 4500          |

**Supplementary Figure 4. (A)** Example of a sample dispensing condition. To dispense 5  $\mu$ L of samples, 13,800  $\mu$ s of open time (O.T.) and 6 kPa of pressure (P) were used. **(B)** The X, Y, and Z position and the well-to-well (W2W) or pillar-to-pillar distance of sample plates and pillar plates in  $\mu$ m

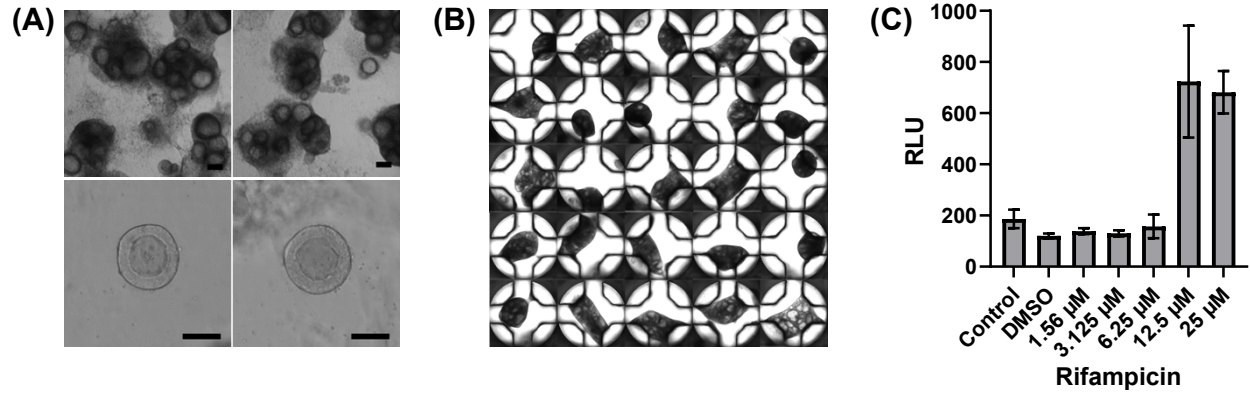

**Supplementary Figure 5. Generation of HLOs by differentiation of 72-3 iPSCs.** (A) Representative images of HLOs generated in 50 µL Matrigel domes in a 24-well plate (Upper row, scale bars: 200 µm) and magnified images of individual HLOs (Bottom row, scale bars: 50 µm). (B) Stitched image of day 25 HLOs on the 384PillarPlate. Day 7 foregut cells were suspended in 2-fold diluted Matrigel and printed on the pillar plate at the seeding density of 3,000 cells/pillar. (C) Induction of CYP3A4 by treatment of HLOs with rifampicin at the concentration range of 1.6 µM - 25 µM. The control condition contains no DMSO and no rifampicin whereas the DMSO condition contains 0.5% DMSO alone in the culture medium. All rifampicin treatment conditions contain 0.5% DMSO.
